# Supplementary material for: Stoichiometric and catalytic C–F bond activation by the trans-dihydride NHC complex [Ru(IEt2Me2)2(PPh3)2H2] (IEt2Me2= 1,3-diethyl-4,5-dimethylimidazol-2-ylidene)
Source: Royal Society of Chemistry journal article supplement (doi:10.1039/c5dt01996f), 2015-01-01
Supplement: c5dt01996f1.pdf [file c5dt01996f1.pdf]

SUPPORTING INFORMATION

**Stoichiometric and Catalytic C-F Bond Activation by the *Trans*-Dihydride  
NHC Complex [Ru(IEt<sub>2</sub>Me<sub>2</sub>)<sub>2</sub>(PPh<sub>3</sub>)<sub>2</sub>H<sub>2</sub>] (IEt<sub>2</sub>Me<sub>2</sub> = 1,3-diethyl-4,5-  
dimethylimidazol-2-ylidene)**

Mateusz K. Cybulksi, Ian M. Riddlestone, Mary F. Mahon, Timothy J. Woodman and Michael K.

Whittlesey

*Departments of Chemistry and Pharmacy and Pharmacology, University of Bath, Claverton Down, Bath*

*BA2 7AY, UK*

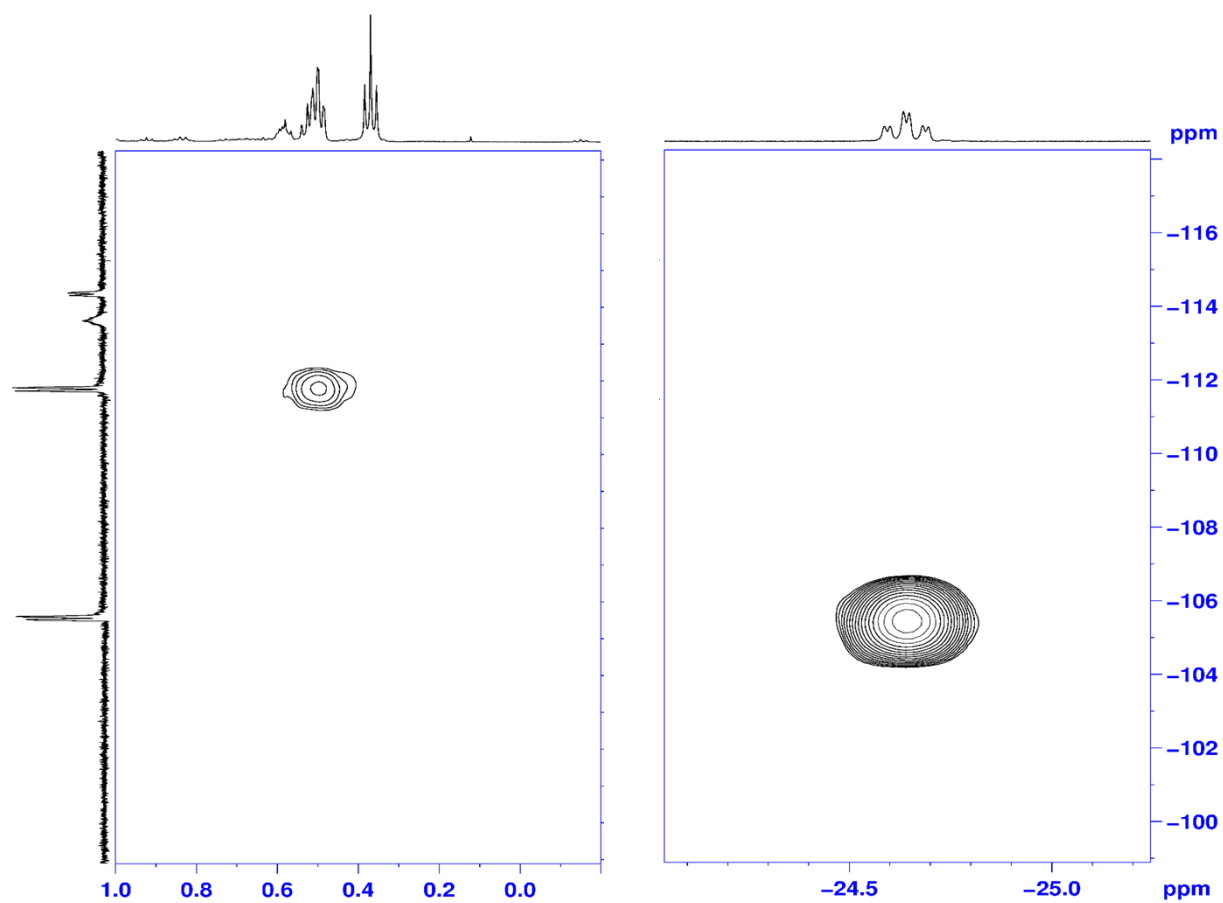

**Fig. S-1** Expanded regions from the  $^1\text{H}$ - $^{19}\text{F}$  HMBC spectrum of **4** showing contacts between methyl protons at  $\delta$  0.48 and fluorine at  $\delta$  -112, and between hydride at  $\delta$  -24.7 and fluorine at  $\delta$  -105 ppm.

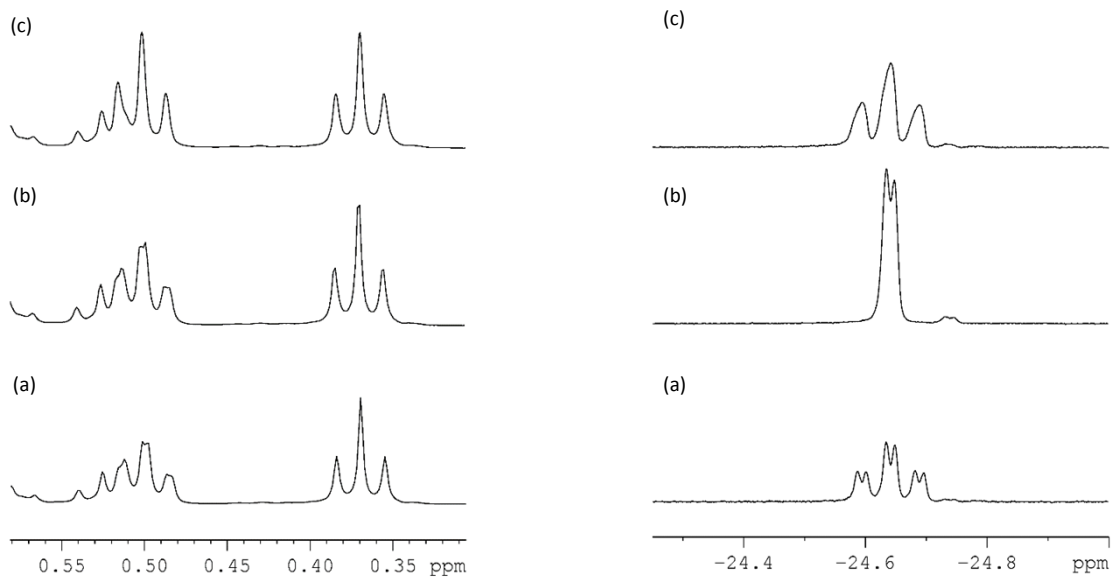

**Fig. S-2** Expanded regions of the  $^1\text{H}$  NMR spectrum of **4** under a variety of multinuclear decoupling conditions. (a)  $^1\text{H}$  only, (b)  $^1\text{H}\{^{31}\text{P}\}$ , (c)  $^1\text{H}\{^{19}\text{F}\}$ .

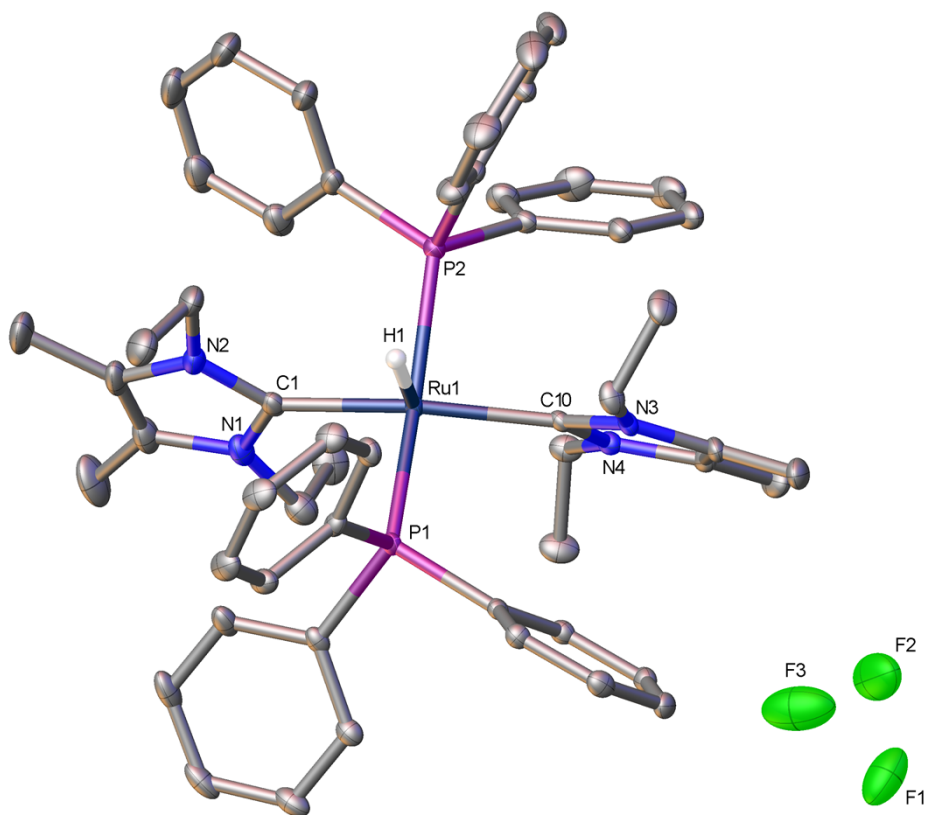

**Fig. S-3** Molecular structure of **5**. Hydrogen atoms (with the exception of the hydride ligand) have been omitted for clarity. Ellipsoids are shown at the 30% probability level. Selected bond lengths (Å) and angles (°): Ru(1)-C(1) 2.072(3), Ru(1)-C(10) 2.094(2), Ru(1)-P(1) 2.3473(6), Ru(1)-P(2) 2.3219(6), P(1)-Ru(1)-P(2) 161.13(2), C(1)-Ru(1)-P(1) 90.84(7), C(1)-Ru(1)-C(10) 165.39(10).

**Table S-1** Crystal data and structure refinement details for compound **5**.

|                                             |                                                                                                |
|---------------------------------------------|------------------------------------------------------------------------------------------------|
| Identification code                         | <b>5</b>                                                                                       |
| Empirical formula                           | C <sub>62</sub> H <sub>81</sub> F <sub>3</sub> N <sub>4</sub> O <sub>2</sub> P <sub>2</sub> Ru |
| Formula weight                              | 1134.36                                                                                        |
| Temperature/K                               | 150.15                                                                                         |
| Crystal system                              | monoclinic                                                                                     |
| Space group                                 | P2 <sub>1</sub> /c                                                                             |
| a/Å                                         | 17.4810(4)                                                                                     |
| b/Å                                         | 15.6824(3)                                                                                     |
| c/Å                                         | 20.8972(4)                                                                                     |
| α/°                                         | 90                                                                                             |
| β/°                                         | 90.399(2)                                                                                      |
| γ/°                                         | 90                                                                                             |
| Volume/Å <sup>3</sup>                       | 5728.7(2)                                                                                      |
| Z                                           | 4                                                                                              |
| ρ <sub>calc</sub> /g/cm <sup>3</sup>        | 1.315                                                                                          |
| μ/mm <sup>-1</sup>                          | 0.386                                                                                          |
| F(000)                                      | 2392.0                                                                                         |
| Crystal size/mm <sup>3</sup>                | 0.5064 × 0.2745 × 0.0819                                                                       |
| Radiation                                   | MoKα (λ = 0.71073)                                                                             |
| 2θ range for data collection/°              | 6.59 to 54.97                                                                                  |
| Index ranges                                | -22 ≤ h ≤ 22, -20 ≤ k ≤ 17, -27 ≤ l ≤ 25                                                       |
| Reflections collected                       | 56957                                                                                          |
| Independent reflections                     | 13111 [R <sub>int</sub> = 0.0423, R <sub>sigma</sub> = 0.0412]                                 |
| Data/restraints/parameters                  | 13111/69/724                                                                                   |
| Goodness-of-fit on F <sup>2</sup>           | 1.025                                                                                          |
| Final R indexes [I ≥ 2σ (I)]                | R <sub>1</sub> = 0.0420, wR <sub>2</sub> = 0.0949                                              |
| Final R indexes [all data]                  | R <sub>1</sub> = 0.0614, wR <sub>2</sub> = 0.1046                                              |
| Largest diff. peak/hole / e Å <sup>-3</sup> | 0.72/-0.63                                                                                     |

Notes:

H1 located and refined at a distance of 1.6 Angstroms from Ru1. There are two THF present as guests in the asymmetric unit; that based on O2 was disordered and modelled as being distributed over 2 sites in a 55:45 ratio. C-O and C-C distances in this disordered moiety were treated as being similar to aid convergence. ADP restraints were also included for the same reason.

The 2 hydrogen atoms associated with the 3 fluorines could not be reliably located for refinement and, hence, these were omitted from the refinement.
